1 **Social isolation modulates appetite and defensive behavior via a common**  
2 **oxytocinergic circuit in larval zebrafish**

3  
4 **Caroline L. Wee**<sup>1,2,3§</sup>, **Erin Song**<sup>1§</sup>, **Maxim Nikitchenko**<sup>1,4§</sup>, **Sandy Wong**<sup>1</sup>, **Florian Engert**<sup>1\*</sup>,  
5 **Samuel Kunes**<sup>1\*</sup>

6  
7 §Equal-contribution first authors

8 \*Corresponding authors

9

10 **Affiliations:**

11 <sup>1</sup>Department of Molecular and Cellular Biology and Center for Brain Science, Harvard  
12 University, Cambridge, Massachusetts, USA

13 <sup>2</sup>Program in Neuroscience, Department of Neurobiology, Harvard Medical School, Boston,  
14 Massachusetts, USA

15 <sup>3</sup>Present address: Institute of Molecular and Cell Biology, A\*STAR, Singapore

16 <sup>4</sup>Present address: Duke University, Durham, North Carolina, USA

17

18 **Correspondence:**

19 Florian Engert / Samuel Kunes

20 Department of Molecular and Cellular Biology

21 Harvard University, 16 Divinity Ave, Biolabs 2073

22 Cambridge, MA 02138, USA

23

24 **ABSTRACT**

25 How brains encode social stimuli and transform these representations into advantageous  
26 behavioral responses is not well-understood. Here, we show that social isolation activates an  
27 oxytocinergic, nociceptive circuit in the larval zebrafish hypothalamus. We further demonstrate  
28 that chemical cues released from conspecific animals modulate its activity to regulate defensive  
29 behaviors and appetite. Our collective data reveals a model through which social stimuli can be  
30 integrated into fundamental neural circuits to mediate adaptive behaviour.

31

32

33

34

## 35 INTRODUCTION

36 In mammals, signaling in oxytocinergic (OXT) circuits modulates a wide spectrum of socially  
37 driven behaviors, ranging from pair bonding and parental care to the responses to stress and  
38 pain<sup>1-3</sup>. OXT has also been described as a potent regulator of appetite<sup>4,5</sup>. We reported recently  
39 that the larval zebrafish OXT circuit encodes a response to aversive, particularly noxious stimuli  
40 and directly drives nocifensive behavior via brainstem premotor targets<sup>6</sup>. Moreover, studies in  
41 both zebrafish<sup>6-8</sup> and mammals<sup>9,10</sup> suggest that the OXT-expressing neuronal population is  
42 anatomically and functionally diverse, and might also modulate multiple behaviors in zebrafish.  
43 Here, in a brain-wide screen<sup>11</sup> for neuronal populations whose activity reflects social context, we  
44 show that larval zebrafish oxytocinergic circuits display diverse responses to conspecific  
45 chemosensory stimuli, and are key effectors for social context modulation of nociceptive and  
46 appetite-driven behaviors. Our results reveal a simple algorithm by which neuromodulatory  
47 neurons can represent social context to exert flexible control over hard-wired behavioral drives.

## 48 RESULTS

### 49 Brain-wide activity mapping of social isolation and its rescue by conspecific chemical cues

50 Using pERK based whole-brain activity mapping (MAP-Mapping<sup>11</sup>), neural activity in brains of  
51 briefly (2 hrs) socially-isolated larvae (7 - 8 days-post-fertilization; dpf) was compared to  
52 animals that had been maintained in the presence of similarly-aged conspecifics. We found that  
53 isolated fish showed an enhancement of neural activity in specific regions, including the  
54 telencephalon (especially subpallium), hindbrain, locus coeruleus, area postrema, caudal  
55 hypothalamus, preoptic area (PO, homolog of the hypothalamic paraventricular nucleus in  
56 mammals) and posterior tuberculum (PT) (Fig. 1a-b, Supplementary Movie 1, Supplementary  
57 Data 1). Many of these same regions are activated by noxious or aversive stimuli<sup>6,7</sup>; they may  
58 thus represent the signature activity pattern of a negative internal state, which can be similarly  
59 triggered by social deprivation. Neurons expressing the peptide oxytocin (OXT) are abundant in  
60 the PO and PT<sup>6,12,13</sup> regions, and as we describe below, OXT-positive neuron clusters in both of  
61 these areas (OXT<sub>PO</sub> and OXT<sub>PT</sub> respectively) display greater activity in socially-isolated fish. To  
62 acquire a more precise quantitation of OXT activity in relation to the social environment, we  
63 measured pERK activity for individual GFP-labeled OXT neurons (*Tg(oxt:GFP)*), as well as  
64 surrounding non-OXT PO and PT neurons, in high resolution confocal microscopic images of  
65 dissected brains<sup>6</sup> (Fig. 1c-d, Supplementary Fig. 1). We found that a subset of both OXT  
66 neurons and surrounding non-OXT neurons were significantly more active in socially-isolated  
67 fish, as was recently observed in the context of noxious stimuli<sup>6</sup> (Fig. 1a-b). Thus, the OXT  
68

69 population might encode negative valence stimuli, such as the environmental stimulus of social  
 70 isolation.

71

72 **FIGURE 1**

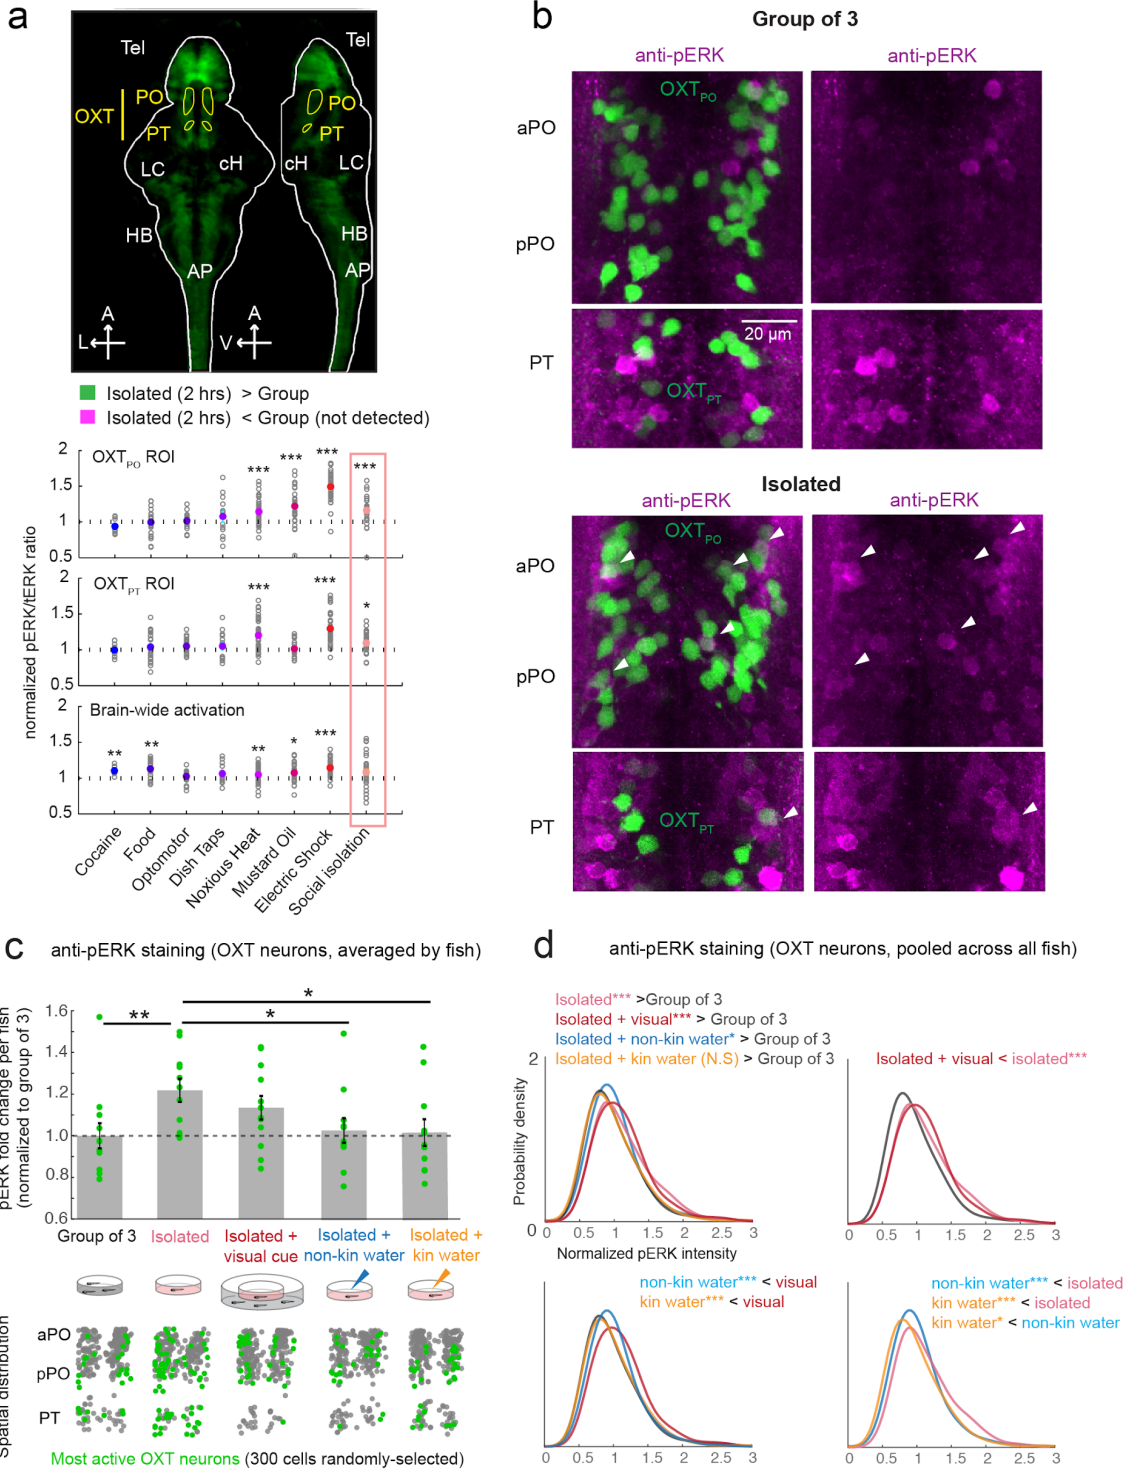

73

74 **Figure 1: phospho-ERK based mapping reveals OXT neuron modulation by social context**

75  
76 **(a) Top:** pERK-based activity mapping to compare brain activity of isolated vs. social fish. Green voxels  
77 highlight regions that are significantly more active in isolated fish as compared to fish maintained in  
78 groups. This final map was generated by averaging data from 5 independent experiments in which  
79 isolated fish are compared to fish kept in groups of 3 (2 experiments), 5 (1 experiment) or 10 (2  
80 experiments) (See **Supplementary Movie 1**; FDR Threshold used = 0.05%. Yellow = Outline of preoptic  
81 ( $OXT_{PO}$ ) and posterior ( $OXT_{PT}$ ) oxytocin populations). These masks were used for the quantification of  
82 activity in **bottom**. Other ROIs are quantified in **Supplementary Data 1**. Tel = Telencephalon, cH =  
83 Caudal Hypothalamus, LC = Locus Coeruleus, AP = Area Postrema, HB = Hindbrain.

84 **Bottom:** Social isolation significantly activates OXT-expressing brain regions. Here, the mean pERK  
85 signal was calculated per fish across the specified ROIs. Data for other stimuli was also included in Wee  
86 et al (2019)<sup>6</sup>. Adjusted p values for social isolation: \*\*\*p = 0.00084 ( $OXT_{PO}$ ), \*p = 0.03 ( $OXT_{PT}$ ), 0.42  
87 (whole brain). Wilcoxon signed-rank test relative to a median of 1, Bonferroni correction.

88  
89 **(b)** High-resolution imaging of pERK expression in OXT neurons in brains from dissected isolated fish  
90 (**bottom**), compared to the brains of fish kept in groups of 3 (**top**). Maximum intensity projection of one  
91 fish from each condition are shown (green = preoptic ( $OXT_{PO}$ ) and posterior ( $OXT_{PT}$ ) oxt:GFP-positive  
92 neurons, magenta = anti-pERK staining). White arrows indicate OXT neurons with high pERK intensities.  
93 Scale bar = 20  $\mu$ m.

94  
95 **(c) Top:** Effect of social isolation and social sensory cues on mean OXT (PO + PT combined, green)  
96 neuron activity per fish. pERK intensities of individual OXT and non-OXT (see **Supplementary Fig. 1**)  
97 cells were extracted automatically as reported in Wee et al (2019)<sup>6</sup>. pERK intensities shown are  
98 normalized to those of control fish (i.e. fish maintained in groups of 3). Social isolation induced a 1.2 fold  
99 increase in OXT neuron pERK activity relative to fish maintained in groups of 3. Visual cues of  
100 conspecifics moderately reduced OXT neuron pERK activity (1.1 fold relative to group), non-kin and kin  
101 water cues induced an even stronger reduction in OXT neuron pERK activity (1.01 and 1.00 fold relative  
102 to group). OXT neurons: p= 0.0074\*\* (group vs isolated) / 0.069 (group vs visual) / 0.52 (group vs non-  
103 kin water) / 0.83 (group vs kin water) / 0.37 (isolated vs visual) / 0.022\* (isolated vs non-kin water) /  
104 0.036\* (isolated vs kin water) / 0.21 (visual vs non-kin water) / 0.19 (visual vs kin water) / 0.65 (kin vs  
105 non-kin water). **Bottom:** Spatial distribution of the most active OXT-positive neurons. Active neurons  
106 were defined using a pERK intensity threshold above which only 10% of neurons are active in the control  
107 (i.e group of 3) condition. 300 OXT cells were randomly sampled across all fish.

108  
109 **(d)** Probability distributions (kernel density estimate (KDE)) of normalized pERK fluorescence across all  
110 neurons per group. Multiple panels are shown to aid visualization. Fish were either kept in groups of 3  
111 (gray, n = 993 neurons from 12 fish), isolated (pink, n = 931 neurons from 11 fish), isolated but exposed  
112 to visual cues of conspecifics through a transparent barrier (red, n = 902 neurons from 12 fish) or isolated  
113 but exposed to non-kin-conditioned water (blue, n = 866 neurons from 11 fish) or kin-conditioned water  
114 (orange, n= 856 neurons from 12 fish). Isolated fish had significantly higher OXT neuron pERK activation  
115 than fish in a group (\*\*\*p =  $2.6 \times 10^{-35}$ ). Isolated fish presented with visual conspecific or non-kin water  
116 cues also had significantly higher OXT pERK activity than fish in a group (\*\*\*p =  $4.8 \times 10^{-15}$  and \*p = 0.027  
117 respectively), whereas kin water did not significantly change OXT neuron activity relative to fish in group  
118 (p = 0.67). All cue types significantly reduced OXT neuron activity relative to isolated fish (\*\*\* $2.8 \times 10^{-6}$   
119 (visual), \*\*\* $6.3 \times 10^{-26}$  (non-kin), \*\*\* $2.0 \times 10^{-34}$  (kin)). Kin water induced significantly-lower OXT neuron  
120 activity relative to non-kin water (\*p = 0.012). Both kin and non-kin water reduced OXT neuron activity  
121 significantly more than visual cues (\*\*\*p =  $2.9 \times 10^{-15}$  and \*\*\*p =  $2.6 \times 10^{-9}$  respectively), two-sided Wilcoxon  
122 rank-sum test.

123           As a step toward elucidating the nature of the social signal, we compared OXT neuronal  
124 activity in animals exposed to the separated visual or chemical cues of a social environment.  
125 We find that water conditioned by prior exposure to conspecific larval fish (see Methods)  
126 reduced the elevated OXT neuronal activity observed in socially isolated fish, whereas visual  
127 exposure to conspecific larval fish (maintained in a separate water enclosure) had minimal  
128 effect (Fig. 1c-d). We also examined the effect of water conditioned with similarly-aged sibling  
129 (kin) fish in relation to similarly-aged fish of a different strain background (non-kin). Both ‘kin’  
130 and ‘non-kin’ conditioned water was sufficient to reduce OXT neuron activity (Fig. 1c-d), but the  
131 effect of kin water was significantly stronger (Fig. 1d). Nearby OXT-negative neurons in the PO  
132 and PT area were also suppressed by conspecific-conditioned cues (Supplementary Fig. 1).  
133 Thus OXT and PO/PT neural activity in larval zebrafish is increased during brief (2 hr) social  
134 isolation, and this activity is equivalently (and rapidly, see Fig. 2) suppressed by exposure to  
135 water that had held conspecific larval fish.

136  
137 *In vivo calcium imaging reveals diverse olfactory and OXT neuronal responses to chemical*  
138 *conspecific cues*

139 We next turned to *in vivo* calcium imaging to acquire a temporally precise record of OXT  
140 neuronal activity. Imaging was performed on larvae in which *UAS:GCaMP6s* was driven directly  
141 in OXT neurons with an *oxt:Gal4* driver (Fig. 2a). Tethered 8-11 dpf fish were subjected to either  
142 conditioned or control water released in 10 second pulses. We show that pure water flow, which  
143 represents a mechanosensory stimulus, mildly activated OXT neurons, whereas water that had  
144 been conditioned by prior incubation with larval fish triggered an immediate relative reduction of  
145 OXT neuronal activity (Fig. 2a,e-f). We next tested whether OXT neuron calcium activity also  
146 discriminates between kin and non-kin conspecific cues<sup>14,15</sup>. To that end, OXT neuronal  
147 activity was compared between sibling-conditioned water (kin water’) and water conditioned by  
148 larvae of a distinct genetic background<sup>16</sup> (‘non-kin water’). We also examined water conditioned  
149 by the presence of adult kin, which is potentially an aversive predator cue, as adult zebrafish  
150 consume their own young. To minimize the effects of familiarity, conspecifics used to generate  
151 conditioned cues were raised apart (in a different dish) from experimental fish.

152           Since water-borne chemical cues likely act as odorants, we included the olfactory bulb  
153 (OB) in the areas specifically interrogated for changes in neuronal activity upon exposure to  
154 these cues. When examined via labeling with the pan-neuronal GCaMP line *HuC:GCaMP6s*  
155 (Fig. 2a-d, Supplementary Fig. 2), each of the three conditioned water types (kin, non-kin and  
156 adult kin) generated overlapping but distinct activity signatures within the OB and OXT

157 populations (Fig. 2). As expected, kin water led to a relative reduction of the OXT neuron  
 158 response (Fig. 2e-f). Adult water, on the other hand, led to a net increase in OXT activity with  
 159 longer lasting dynamics, correlating with similarly longer lasting olfactory responses (Fig. 2c, e-  
 160 f). Notably, non-kin water was less effective in reducing OXT neuron activity than kin water, and  
 161 it elicited much weaker OB activity (Fig. 2f, also compare Fig. 2b to 2e), suggesting some subtle  
 162 differences between kin and non-kin water effects that had also been observed with pERK  
 163 imaging (compare with Fig. 1d).

164

165 **FIGURE 2**

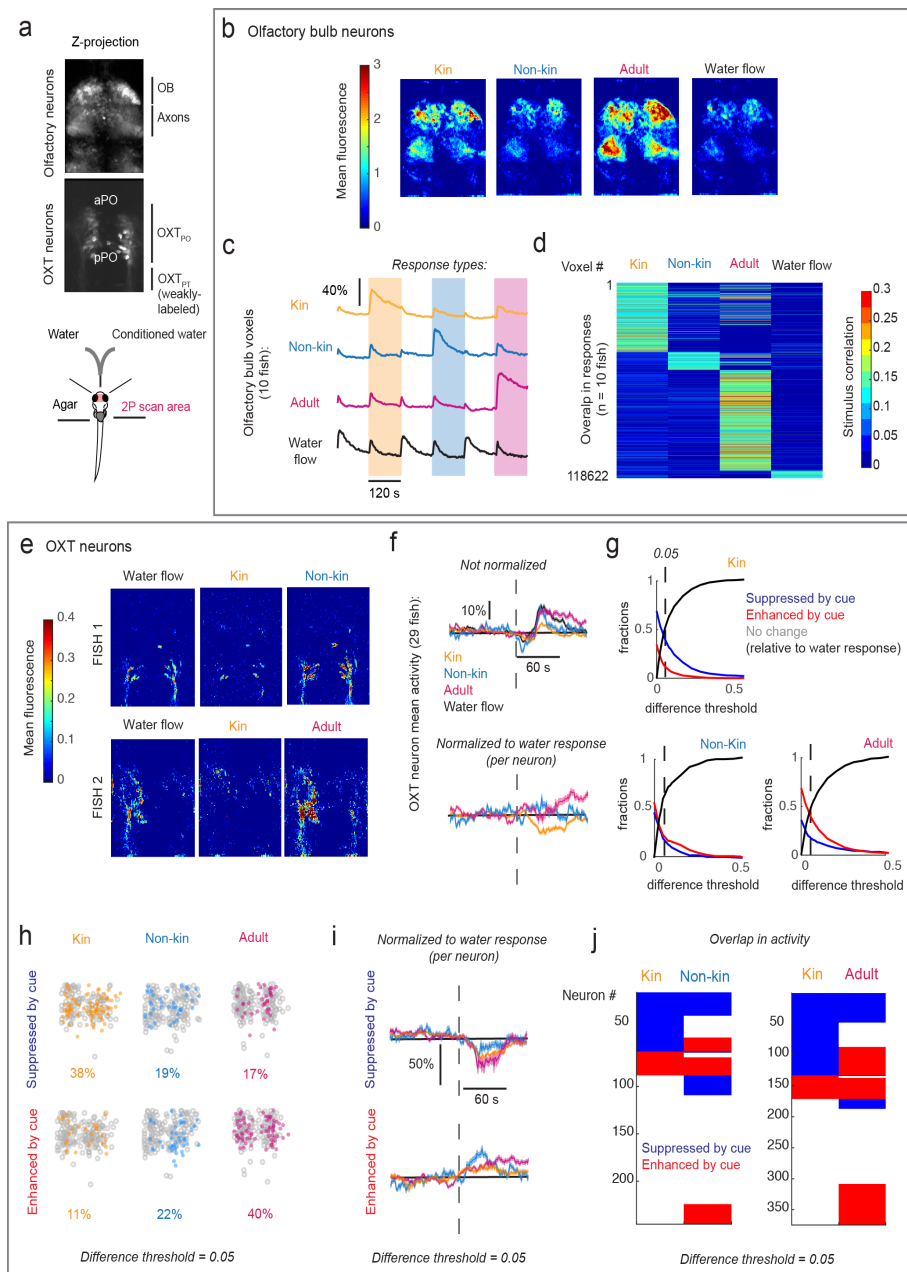

166

167 **Figure 2: Calcium imaging confirms OXT neuron modulation by conspecific cues**

168

169 **(a) Top:** Z-projection of volumetrically-scanned brain regions (olfactory bulb and oxytocin neurons). The  
170 olfactory bulb was labeled using *Tg(HuC:GCaMP6s)*. The *Tg(oxt:Gal4; UAS:GCaMP6s)* transgenic line  
171 labels OXT<sub>PO</sub> neurons strongly, with weaker labeling of the OXT<sub>PT</sub> cluster. We did not image both regions  
172 simultaneously. **Bottom:** Schematic of imaging and cue delivery setup.

173

174 **(b-d) Olfactory Bulb (OB) Imaging**

175 **(b)** Mean OB fluorescence in response to different stimuli (kin, non-kin, adult or water flow) integrated  
176 over a 60 s period post-stimulus from a single fish. See **Supplementary Fig. 2** for more examples.

177

178 **(c)** Mean stimulus-triggered calcium responses from 10 fish. All four stimuli (kin, non-kin, adult or water  
179 flow) were presented to each fish. Each plot is the average calcium trace of all OB voxels that are  
180 selective for one of the four stimuli. On average, about 5/1.5/10/1% of voxels (n=17856/5357/34672/3522  
181 out of 345688 total voxels) were specific to kin, non-kin, adult conditioned water and water respectively.  
182 Olfactory responses are sustained and decay slowly throughout the imaging interval (2 min).

183

184 **(d)** Quantification of overlap of OB responses to different stimuli (118622 voxels that are responsive  
185 ( $r > 0.1$ ) to at least one of the stimuli, aggregated across 10 fish). While many voxels showed specific  
186 activation by individual stimuli, there were some overlapping responses between the cues. Color map  
187 indicates Pearson's correlation coefficient (r-value).

188

189 **(e-j) OXT neuron imaging**

190 **(e)** Mean OXT neuron fluorescence integrated over a 60 s period post-stimulus from two different fish,  
191 one imaged with kin and non-kin water, and another with kin and adult water.

192

193 **(f) Top:** Mean stimulus-triggered calcium responses of OXT neurons. All fish (29 fish, n=1033 neurons)  
194 were imaged with water or kin water, some additionally were imaged with either non-kin (8 fish, n =245  
195 neurons) or adult water (10 fish, n = 374 neurons). **Bottom:** Mean stimulus-triggered calcium responses  
196 of each neuron normalized to its own mean water response. Gray broken line indicates stimulus onset.  
197 Shading indicates SEM.

198

199 **(g)** Fraction of OXT neurons that would be classified as suppressed (blue) or activated (red) by each  
200 water-borne cue, as a function of the mean difference in integrated calcium activity from the water  
201 response (i.e. difference threshold). A threshold of 0.05 (i.e. 5% difference) was used in subsequent  
202 panels.

203

204 **(h)** Spatial distribution and percentages of neurons that show either suppressed (**top**) or enhanced  
205 (**bottom**) responses to each cue relative to water. For accurate comparison of spatial distribution, 200  
206 neurons were randomly selected from each group. Percentages are calculated based on a difference  
207 threshold of 0.05. Kin cues induced the highest percentage suppression (38%) and lowest percentage  
208 activation (11%), whereas adult cues induced the lowest percentage suppression (17%) and highest  
209 percentage activation (40%) of OXT neurons.

210

211 **(i)** Mean stimulus-triggered calcium responses of neurons classified as being suppressed (top) or  
212 enhanced (bottom) by each cue, normalized to their mean water response. Shading indicates SEM.

213

214 **(j)** Visualization of overlapping OXT neuron representations between conspecific cues. Left: overlap  
215 between kin and non-kin water. Right: overlap between kin and adult water. We did not image all 3 cues

216 simultaneously. Red = enhancement, Blue = suppression, White = no change, based on difference  
217 threshold of 0.05. Approximately one third of neurons suppressed by kin water were also suppressed by  
218 non-kin (40%) and by adult water (36%). In addition, a common subset of neurons activated by kin water  
219 were also activated by non-kin (76%) and adult (90%) water. However, 24% and 35% of kin water-  
220 suppressed neurons were alternatively activated by non-kin and adult-conditioned water, respectively.  
221

222 OXT neurons are diverse in their circuit connectivity<sup>8,17-19</sup> and responses to social  
223 deprivation (Fig. 1) and nociceptive input<sup>6</sup>. To further resolve this heterogeneity, we used  
224 calcium imaging to classify individual OXT neurons into populations that either reduce or  
225 increase their activity in response to water-borne conspecific cues. We found that, across a  
226 range of thresholds, the fraction of OXT-positive neurons whose activities were suppressed by  
227 larval kin-conditioned water was consistently higher than the fraction of neurons that were  
228 activated (Fig. 2g). Non-kin-conditioned water, in contrast, induced equivalent neuronal fractions  
229 with increased or suppressed activities. Water conditioned by adult fish triggered a greater  
230 fraction of neurons with enhanced activity (Fig. 2g). Under all conditions, activated or  
231 suppressed neurons were spatially distributed throughout the OXT-positive PO and PT  
232 domains, instead of being segregated into distinct areas (Fig. 2h-i). Further, the specific  
233 response properties of individual neurons to one conspecific cue did not predict strongly how  
234 they would respond to alternate cues, although we observed that kin water-activated OXT  
235 neurons tended to also be commonly activated by other conspecific (non-kin or adult) cues (Fig  
236 2j). The heterogeneity of the population suggests that OXT neurons as a group are able to  
237 differentially encode these stimuli and provide a basis to discriminate between them in affecting  
238 behavior.  
239

#### 240 *Conspecific cues suppress nociceptive OXT circuits and defensive behavior*

241 Social buffering is a widely-observed phenomenon in which the presence of conspecifics  
242 ameliorates the effects of aversive experience<sup>20,21</sup>. We previously showed that a large fraction of  
243 OXT neurons are activated by noxious stimuli and drive defensive behaviors, specifically  
244 through brainstem premotor targets that trigger vigorous large-angle tail bends<sup>6</sup>. Given that most  
245 of the OXT circuitry appears to be suppressed by water-borne social cues derived from closely-  
246 related conspecifics, we posited that these cues might reduce the nocifensive behavior induced  
247 by the stimulation of TRPA1 receptors. Indeed, increased swim speed triggered by nociceptive  
248 TRPA1 receptor activation was significantly ameliorated by the presence of kin-conditioned  
249 water (Supplementary Fig. 3). Consistent with the idea that this reduced nocifensive response  
250 involves the suppression of OXT neurons, kin water significantly also reduced the peak tail  
251 angles of responses to TRPA1 stimulation in tethered fish (\*\*p = 0.0081, n = 16 fish, Fig. 3a-b).



252 **FIGURE 3**

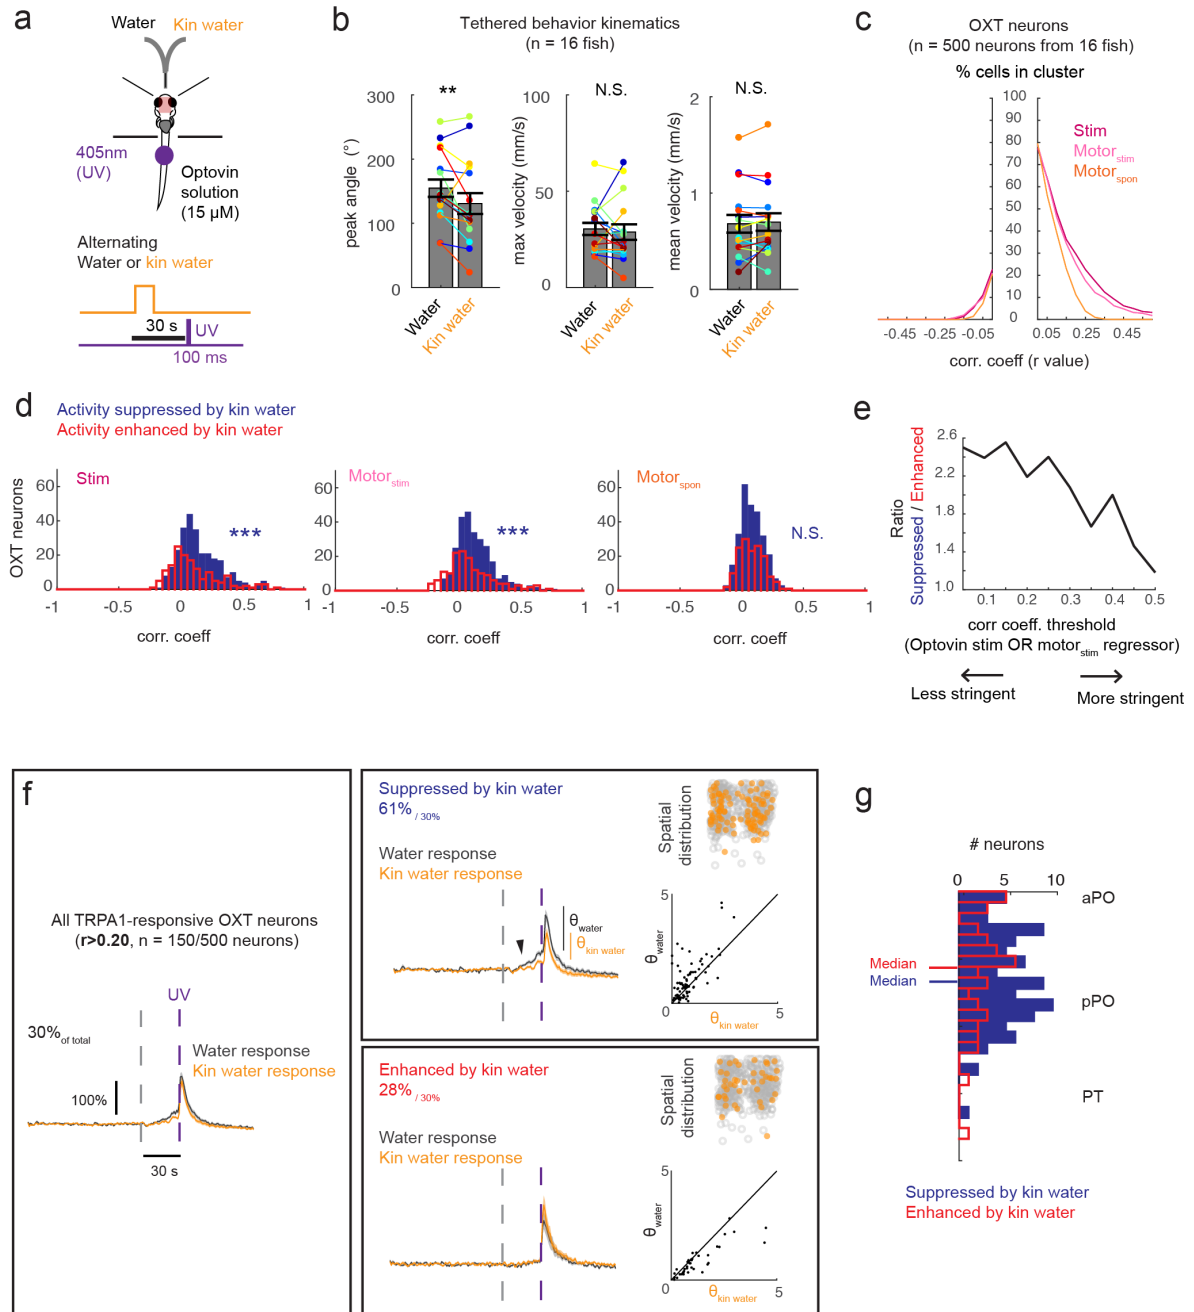

253

254 **Figure 3: Chemical kin cues modulate OXT nociceptive responses and defensive behavior**

255

256 **(a)** Top: Schematic showing setup to probe effect of conspecific-conditioned water on TRPA1-induced  
257 nociceptive responses. Bottom: Fish were tethered with their nose/mouth and tails freed, and incubated in  
258 15  $\mu$ M Optovin solution. Alternating pulses of water or conspecific water were presented, followed by a  
259 100 ms pulse of UV light after 30 s to activate TRPA1 receptors.

260

261 **(b)** Kin water significantly reduced the mean peak tail angle (\*\*p = 0.0081) of TRPA1-induced tail bends.  
262 Maximum and mean velocity was not significantly changed (p = 0.18 and 0.63). One-sided Wilcoxon  
263 signed-rank test, n = 16 fish.  
264  
265 **(c)** The calcium trace of each OXT neuron was cross-correlated with stimulus regressors or motor  
266 regressors either within 5 s of TRPA1 stimulation (motor<sub>stim</sub>), or outside of the post-stimulus window  
267 (motor<sub>spont</sub>), as in Wee et al (2019)<sup>6</sup>. Panel shows percentage of OXT cells that will be classified as  
268 stimulus, motor<sub>stim</sub> or motor<sub>spont</sub>-correlated as a function of Pearson's correlation coefficient threshold (r-  
269 value).  
270  
271 **(d)** Distribution of OXT neurons that are either suppressed (blue) or enhanced (red) by kin water, as a  
272 function of their Pearson's correlation coefficient with the stimulus, motor<sub>stim</sub> or motor<sub>spont</sub> regressors.  
273 Neurons that show kin water-induced suppression are significantly more correlated to TRPA1 motor and  
274 stimulus regressors (\*\*p = 7.2x10<sup>-5</sup> (stim), \*\*\*p = 9.3x10<sup>-5</sup> (motor<sub>stim</sub>), but not spontaneous movement  
275 regressors (p = 0.35).  
276  
277 **(e)** As the threshold for correlation with stim or motor<sub>stim</sub> regressors is relaxed (i.e. approaching smaller  
278 values), a larger proportion of suppressed rather than activated neurons are observed, suggesting that  
279 moderately TRPA1-responsive neurons are most strongly suppressed by kin water. As in **Fig. 2**, a  
280 difference threshold of 0.05 (i.e. 5%) was the cutoff for determining if responses were enhanced or  
281 suppressed by kin water.  
282  
283 **(f) Left panel:** Mean stimulus-triggered calcium responses of all TRPA1-responsive neurons in the  
284 presence of water (black) or kin-conditioned water (orange), as a function of a medium stim or motor<sub>stim</sub>  
285 regressor coefficient threshold (r = 0.20) used to identify these neurons. See **Supplementary Fig. 4** for  
286 plots using other r-value thresholds. Shading indicates SEM. Gray dashed line = water or kin water  
287 delivery, Purple dashed line = UV stimulus onset. **Right panels:** Mean stimulus-triggered calcium  
288 responses for all TRPA1-activated neurons that are suppressed (**top**) or activated (**bottom**) by kin water,  
289 again for threshold of r = 0.20. n = 151 neurons (all TRPA1 activated) / 92 neurons (61%, suppressed by  
290 kin water) / 42 neurons (28%, activated by kin water) for both control and kin water conditions. **Top inset**  
291 shows the spatial distribution of these neurons. All neurons (n=500) are displayed. **Bottom inset**  
292 compares the magnitude ( $\theta$ ) of calcium fluorescence ( $\Delta f/f$ ) change before and after TRPA1 stimulation for  
293 neurons that were identified to be suppressed or activated by kin water. Despite the differences in  
294 baseline activity that are induced by water flow (**see black arrow**) the magnitude of calcium fluorescence  
295 change post-TRPA1 stimulation is still modulated by kin water.  
296  
297 **(g)** Distribution along the A-P axis of suppressed and enhanced neurons (r>0.20).  
298  
299

300 To further tie nociceptive responses to social modulation of OXT neurons, we examined  
301 the effect of conspecific cues on the subset of OXT neurons that respond to TRPA1 stimulation.  
302 As we had previously done<sup>6</sup>, each neuron's calcium activity was correlated with stimulus and  
303 motor regressors (Fig. 3c). For motor regressors, we further classified responses into those that  
304 occurred within 5 s of the stimulus (motor<sub>stim</sub>) or at other time points in the experiment (motor<sub>spont</sub>).  
305 Individual OXT neurons were then subsequently grouped according to whether they displayed  
306 suppressed or enhanced TRPA1 responses following kin water presentation. We found that kin

307 water-suppressed neurons had significantly higher (right-shifted on the graph shown in Fig. 3d)  
308 correlations with TRPA1 stimulus and motor<sub>stim</sub> regressors. Indeed, among OXT neurons that  
309 had high TRPA1 responsiveness ( $r > 0.35$ ; 13% of OXT neurons), a larger fraction of neurons  
310 were suppressed (55%) rather than activated (33%) by kin water (Supplementary Fig. 4).

311 However, when *less stringent* criteria was used to define TRPA1 responsiveness (e.g.  $r$   
312  $> 0.20$ , Fig 3f), the ratio of kin water-suppressed to kin water-activated OXT neurons increased  
313 even further (Fig. 3d-e, also see Supplementary Fig. 4), indicating that the bulk of kin water-  
314 suppressed OXT neurons are only moderately-responsive to TRPA1. When we included these  
315 moderately-responsive OXT neurons in our analysis, we observed a clear divergence from  
316 baseline activity *before* TRPA1 activation, which was induced by water flow alone (Fig. 3f, top  
317 right panel), suggesting that these kin water-suppressed OXT neurons had *both* a water flow-  
318 induced and TRPA1-specific response. Thus many kin water-suppressed OXT neurons are not  
319 only responsive to TRPA1 stimulation, but also to other potentially aversive stimuli such as  
320 water flow.

321 Notably, kin water was sufficient to reduce responses to *both* water flow *and* TRPA1  
322 stimuli (even when accounting for baseline differences; Fig. 3f, top right panel). Further, these  
323 kin water-suppressed neurons also tended to be more posteriorly-distributed, consistent with the  
324 idea that they correspond to parvocellular, hindbrain-projecting neurons which drive motor  
325 output<sup>6</sup> (Fig. 3g). In contrast, OXT neurons that showed enhanced activation under exposure to  
326 kin water were more highly-selective for TRPA1 activation, and did not show apparent  
327 responses to water flow (Fig. 3f, bottom right panel). Thus, the reduced nocifensive responses  
328 of larval fish observed in the presence of social cues is directly reflected in the suppressed  
329 activity of a subset of TRPA1-responsive neurons within the OXT circuit.

330

### 331 OXT neuronal activity suppresses appetite in a conspecific cue-dependent manner

332 In mammals, social isolation is associated not only with increases in aversive behavior, but also  
333 with a reduction in positive-valence behaviors such as feeding<sup>22</sup>. To determine if this is also the  
334 case in larval zebrafish, we first made use of an established and quantitative food intake assay  
335 that measures gut fluorescence intensity caused by the ingestion of fluorescently-labeled  
336 paramecia<sup>23-25</sup> (Fig. 4a). In this assay, larval fish were food deprived for a period of two hours to  
337 increase appetite<sup>23-25</sup>, either in isolation or in the presence of conspecific fish (Fig. 4a).

338 Subsequently, animals maintained under either of these two conditions were presented with  
339 large excess of fluorescently labeled paramecia. Notably, fish maintained in isolation consumed  
340 significantly less paramecia (i.e. food) than those kept in small groups. Additionally, when group

341 size was varied from 2 to 5 individuals, food intake per capita was observed to scale with group  
 342 size (Fig. 4b). Finally, we observed that water-borne cues from closely related larval fish (kin  
 343 fish), but not visual cues, were sufficient to rescue the isolation-induced suppression of food  
 344 intake (Fig. 4c).

345

346 **FIGURE 4**

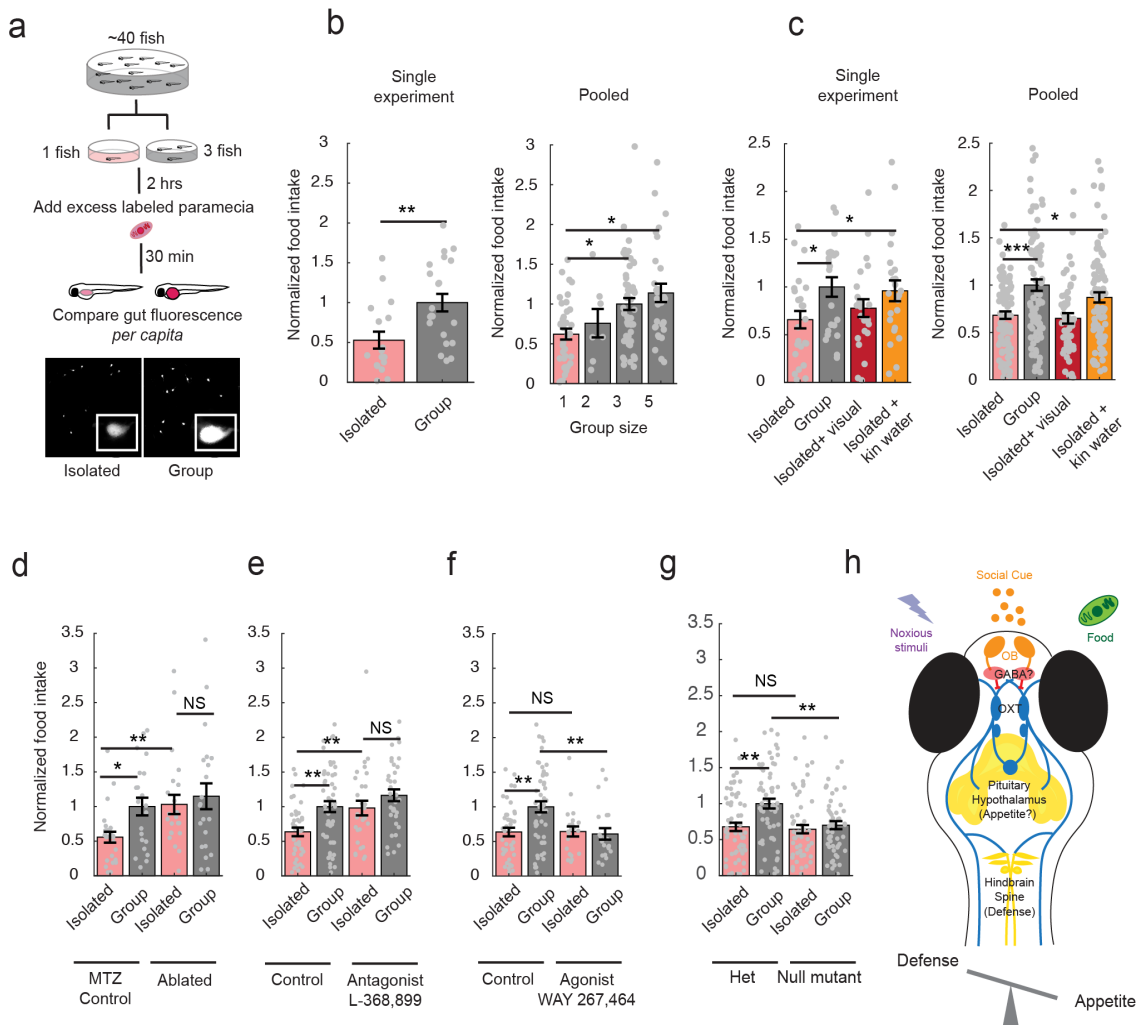

347

348 **Figure 4: Manipulation of OXT signaling affects appetite in a social-context dependent manner**

349

350 **(a)** Schematic of social behavior experiments. Larval zebrafish were raised in a group up to 7 or 8 dpf.  
 351 They were then either isolated in a small dish or into a small group of 3 fish. After 2 hrs, fluorescently-  
 352 labeled paramecia was added for 30 min, following which fish were fixed and subsequently imaged.  
 353 Example raw fluorescence images are shown, with inset showing higher (100x) magnification image.  
 354 Integrated gut fluorescence (area x intensity) was used to approximate food intake.

355

356 **(b) Left:** Gut fluorescence quantification from a single experiment demonstrates that isolated fish on  
 357 average eat less, per capita, than fish in a group of 3. All gut fluorescence measurements are normalized  
 358 to the mean food intake of fish in a group (\*\*p = 0.0058, n = 21/17 fish, two-sided Wilcoxon rank-sum

359 test). **Right:** Normalized food intake (i.e. gut fluorescence normalized to the average gut fluorescence of  
360 fish in a group of 3) scales with group size (n = 36, 7, 52, 29 fish, single asterisks depict p<0.05 using  
361 one-way ANOVA corrected for multiple comparisons).

362  
363 **(c) Left:** Chemical but not visual cues were sufficient to rescue isolation-induced feeding suppression in  
364 a single experiment. \*p = 0.03 (single vs group), \*p = 0.04 (single vs kin water), p = 0.17 (single vs visual),  
365 n = 24/24/22/23 fish, two-sided Wilcoxon rank-sum test. **Right:** Average of multiple experiments. p =  
366 \*\*\*2.8283x10<sup>-4</sup> (single vs group), \*p = 0.02 (single vs kin water), p = 0.35 (single vs visual), n =  
367 86/86/55/87, Wilcoxon rank-sum test.

368  
369 **(d)** Cell-specific chemical ablation of OXT neurons specifically rescues effect of social isolation on  
370 appetite (n = 65/59/57/56 fish). \*p = 0.015 (single vs group), \*\*p = 0.0017 (single control vs single  
371 ablated), p = 0.76 (single ablated vs group ablated), two-sided Wilcoxon rank-sum test. Controls are  
372 metronidazole (MTZ)-treated, non-transgene-expressing siblings.

373  
374 **(e)** Oxytocin antagonist L-368,899 rescues isolation-induced suppression of food intake without  
375 significantly changing food intake in a group (n=40/50/29/34 fish). \*\*p = 0.0022 (single vs group), \*\*p =  
376 0.0091 (single control vs single antagonist), p = 0.09 (single antagonist vs group antagonist), two-sided  
377 Wilcoxon rank-sum test.

378  
379 **(f)** Oxytocin agonist WAY267,484 suppresses food intake in groups but does not affect food intake in  
380 isolated fish (n=40/50/20/21 fish). \*\*p = 0.0022 (single vs group), p = 1 (single control vs single agonist),  
381 \*\*p = 0.0069 (group control vs group agonist), two-sided Wilcoxon rank-sum test. Control groups for both  
382 **(e)** and **(f)** are the same sets of fish, split up for better visualization. All data is from multiple sets of  
383 experiments and normalized to food intake in a group of 3 fish.

384  
385 **(g)** Comparison of food intake of *oxt* null mutants (*oxt*<sup>-/-</sup>) and their heterozygous wild-type siblings (*oxt*<sup>+/-</sup>)  
386 in isolated and non-isolated contexts (n = 60/59/58/54 fish). Single-group differences in food consumption  
387 are abolished -- however, food intake was reduced in groups, rather than enhanced in isolated fish.  
388 \*\*p = 0.0011 (single vs group), p = 0.65 (single control vs single mutant), \*\*p = 0.0012 (group control vs  
389 group mutant), two-sided Wilcoxon rank-sum test.

390  
391 **(h)** Schematic of our model for how oxytocin neurons can integrate information on social state to control  
392 appetite and avoidance behaviors. We posit that social chemical cues are olfactory, and that GABAergic  
393 neurons in the forebrain transform OB activation into inhibitory signals. The OXT circuit modulates  
394 nocifensive behavior via brainstem premotor neurons<sup>6</sup>. Since it projects extensively into other parts of the  
395 hypothalamus, as well as the pituitary gland, these downstream regions may be involved in mediating its  
396 effects appetite<sup>25</sup>.

397  
398 Given that social isolation increases neuronal activity in a subset of OXT-positive  
399 neurons and also suppresses food intake, we asked if OXT neurons are required for the social  
400 control of appetite. To this end, we chemogenetically ablated OXT neurons in larvae expressing  
401 bacterial-nitroreductase specifically in OXT-positive neurons, by incubation them from 5 to 7 dpf  
402 (while still in a group of conspecifics) with the prodrug metronidazole (MTZ). This treatment  
403 resulted in a loss of ~80% of nitroreductase-labeled preoptic OXT cells (unablated = 20.3 ± 1.1  
404 neurons, ablated = 4.5 ± 0.5 neurons; n = 20 control fish, 29 fish with ablation). At 8 dpf, these

405 larvae, or MTZ-treated non-expressing controls, were then separated either into groups of 3 or  
406 isolated, and assayed for feeding as described above.

407 We found that OXT neuron ablation enhanced food intake in isolated animals, while the  
408 food intake of fish maintained in a group was unchanged (Fig. 4d). Consistently, addition of an  
409 OXT receptor antagonist strongly increased food intake in isolated fish (Fig. 4e), whereas OXT  
410 agonists strongly suppressed food intake of fish kept in a group (Fig. 4f). These results indicate  
411 that OXT signaling is both necessary and sufficient to mediate the social modulation of food  
412 intake observed in socially isolated fish.

413 Lastly, we compared food intake in OXT homozygous null mutant animals with their  
414 heterozygous siblings. As expected, we found that null mutant animals did not modulate their  
415 food intake on the basis of social environment, whereas the behavior of their heterozygous  
416 siblings was indistinguishable from that of wild type animals. However, mutant animals had low  
417 food intake in both the isolated and the group setting (Fig. 4g). Thus, as with acute ablation of  
418 OXT neurons, social modulation of feeding was impaired. However, the generally low food  
419 intake in these fish might reflect long-term deficits in circuit activity that altered the development  
420 or maintenance of neural circuits involved in socially modulated behaviors. In summary, these  
421 results demonstrate that, similar to nocifensive behaviors, larval zebrafish OXT neurons are  
422 necessary and sufficient for social state modulation of appetite.

423

## 424 **DISCUSSION**

425 Larval zebrafish are generally not thought to exhibit robust social interactions, aside from simple  
426 behaviors such as rudimentary avoidance of other larvae<sup>26</sup>. However, we found that even brief  
427 (2 hr) social isolation results in distinct neural signatures that correlate with aversive and  
428 nociceptive brain circuits, including activity in the preoptic area, posterior tuberculum, caudal  
429 hypothalamus and, notably, populations of oxytocin (OXT)-positive neurons. This is consistent  
430 with the results of a recent study (Tunbak et al, preprint online<sup>27</sup>) that described increased  
431 activity in the preoptic area as a result of long-term social isolation in older (juvenile, 21 dpf)  
432 zebrafish. Thus, in an intriguing parallel to humans<sup>28</sup>, we note that pain and social isolation  
433 exhibit a shared neural signature in the larval zebrafish brain that is likely to extend also to older  
434 animals in this species.

435 Extending the analysis of the OXT-positive population revealed that these neurons are  
436 functionally diverse and modulate distinct behavioral outputs, including feeding and nocifensive  
437 escape responses (see also Wee et al, 2019<sup>6</sup>). We thus propose a circuit mechanism by which  
438 the larval zebrafish integrates conspecific social cues into the modulation of defensive and

439 appetitive behaviors (Fig. 3h). Our data suggest that OXT neurons (and likely other preoptic  
440 populations; Supplementary Fig. 1) encode a range of chemical social information via olfactory  
441 inputs (Supplementary Fig. 2), which then becomes the basis for the modulation of nociceptive  
442 and appetitive behavioral outputs. Indeed, our data reveal that the presence of conspecifics,  
443 and specifically conspecific chemical cues, significantly increases appetite and reduces  
444 nociceptive responses (Fig. 3 & 4). At the circuit level, OXT neurons displayed a variety of  
445 responses to these chemical social cues, which could thus uniquely signal the presence of adult  
446 fish (known predators), genetically-related animals (larval kin), or distantly-related (larval non-  
447 kin) conspecifics. Importantly, we show that kin cues induced the most widespread inhibition of  
448 OXT neurons (Fig. 2), while the same OXT neurons can be either excited or inhibited by other  
449 cues, suggesting multimodal and valence-specific tuning. Notably, conspecific cues increase the  
450 activity of a small subset of OXT neurons that appear to be more sensory in nature suggesting  
451 that these could drive anxiolytic or anti-nociceptive effects, consistent with traditional views of  
452 OXT function<sup>3</sup>.

453 In humans and other mammals, it is known that social cues, including odors, can  
454 attenuate aversive experience and behaviors, a phenomenon known as “social buffering”<sup>20,21</sup>.  
455 Social facilitation of appetite has also been observed in many species<sup>29</sup>, and is likely  
456 evolutionarily adaptive. In general, an isolated animal needs to shift its priorities from foraging to  
457 vigilance or escape, since it may be more susceptible to the risk of predation. Accordingly, adult  
458 zebrafish display isolation stress in a group size-dependent manner<sup>30</sup>. We had previously shown  
459 that OXT neurons respond to a range of aversive, particularly noxious stimuli, and are sufficient  
460 to drive motor responses by acting on brainstem targets<sup>6</sup>. By demonstrating that chemical social  
461 cues converge on this circuit, and that kin cues, in particular, predominantly diminish the activity  
462 of TRPA1-responsive, parvocellular OXT neurons, we provide a potential mechanistic  
463 understanding of how the OXT circuit can mediate the phenomenon of “social buffering” in a  
464 vertebrate organism<sup>31</sup>.

465 Furthermore, our demonstration of a suppressive effect of OXT on appetite corroborates  
466 a series of mammalian research findings: 1) The insatiable appetite and morbid obesity  
467 observed in Prader Willi Syndrome is likely due to impaired OXT signaling<sup>32,33</sup>; 2) Acute  
468 inhibition of paraventricular OXT neurons can promote food intake<sup>34</sup>; 3) Lesions of the PVN, as  
469 well as mutations that affected OXT neuron development, have been shown to cause  
470 hyperphagia and obesity<sup>35,36</sup>, and; 4) Direct administration of OXT has been shown to reduce  
471 feeding<sup>4,5</sup>. At the same time, our data suggests that the role of OXT in feeding may be more  
472 complex than previously appreciated. Notably, while OXT homozygous mutants do not show

473 social state-dependent modulation of appetite, they also eat less than their heterozygous  
474 siblings, implying that a complete absence of OXT may be detrimental towards feeding.

475 Our data further highlight the profound influence of social context on OXT's appetite-  
476 suppressing effects, which may very well generalize to mammals. For example, a recent study  
477 found that inhibiting OXT signaling enhances sugar intake in a socially dominant mouse  
478 regardless of their social context, whereas in subordinate mice, such inhibition only enhanced  
479 appetite when cues from the dominant mouse were not present<sup>37</sup>. Our results also complement  
480 the observations of strong interactions between social and feeding circuits across evolution<sup>38</sup>,  
481 and reinforce a role for OXT in prioritizing various motivated behaviors<sup>4</sup>. However, effects of  
482 OXT in larval zebrafish may occur as part of a coordinated response to both social isolation and  
483 noxious contexts, rather than reproduction or parental care.

484 We do note some important distinctions between our findings and the canonical view of  
485 OXT function as suggested by mammalian studies, the most significant of which is that the  
486 larval zebrafish OXT neurons show widespread *activation* by social isolation, rather than by  
487 cues indicating the presence of conspecifics<sup>2,39</sup>. We propose three possible reasons for these  
488 apparent differences: *first*, representations within both the mammalian and zebrafish OXT  
489 population are diverse and thus the observed activity patterns in zebrafish may reflect those of  
490 specific subpopulations of mammalian OXT cells (indeed, some zebrafish OXT neurons are  
491 activated by conspecific cues, and some mammalian OXT cells are inhibited by conspecific  
492 cues<sup>39</sup>); *second*, OXT response properties may have changed over the course of evolution, as  
493 more sophisticated social functions were derived. *Third*, there is a possibility that OXT neuron  
494 response properties might reverse over the course of development, since adult and kin odor  
495 generate opposite activity signatures; however, since the enhancement of preoptic area  
496 activation appears to persist at least till juvenile stages (Tunbak et al, preprint online<sup>27</sup>), when  
497 social preference behaviours have developed, any such reversal would have to happen closer  
498 to adulthood. Overall, our results may provide a broader and more intricate perspective of  
499 OXT's social function in vertebrate animals.

500 Furthermore, given that noxious stimuli and social isolation both activate the OXT  
501 population, an enhancement of OXT signaling may in fact represent a negative valence state in  
502 larval zebrafish, rather than the rewarding experience it is generally associated with.  
503 Interestingly, recent studies in mammalian models have demonstrated that OXT neurons can  
504 also be negatively reinforcing, and promote fear, stress and anxiety in some situations<sup>1,40</sup>. Thus,  
505 this study could provide an evolutionary perspective on the ancient functions of this highly-  
506 conserved peptide and how they relate to our current understanding of them in mammals.



507 In conclusion, our study demonstrates how organizing principles and circuit  
508 implementation strategies underlying social behavior can be elucidated by probing social  
509 context-dependent behaviors in a small and optically accessible model organism. More broadly,  
510 our dissection of the larval zebrafish OXT circuit provides an entrypoint into understanding how  
511 neuromodulatory systems represent behavioral states such as social isolation, hunger, and  
512 acute nociception, on multiple timescales, and how these representations are then used to  
513 modulate behavioral output in a flexible and context-dependent manner.

514

515

## 516 **METHODS**

### 517 Fish husbandry and transgenic lines

518 Larvae and adults were raised in facility water and maintained on a 14:10 hr light:dark cycle at  
519 28°C. All protocols and procedures involving zebrafish were approved by the Harvard  
520 University/Faculty of Arts & Sciences Standing Committee on the Use of Animals in Research  
521 and Teaching (IACUC). Fish were raised at a density of ~40 fish per dish and fed from 5 dpf till  
522 the day of the experiment. Behavioral experiments were carried out mostly on fish of the WIK  
523 background, although other genotypes (e.g. AB, or *mit1fa*<sup>-/-</sup> (*nacre*) in the AB background) were  
524 also utilized and showed similar behavioral results. *mit1fa*<sup>-/-</sup> (*nacre*) in the AB background,  
525 along with additional transgenes described below, were also used for calcium imaging and  
526 MAP-mapping experiments. Transgenic lines *Tg(oxt:GFP)*<sup>41</sup>, *Tg(UAS:GCaMP6s)*<sup>42</sup>,  
527 *Tg(UAS:nsfbCherry)*<sup>43</sup>, *Tg(HuC:GCaMP6s)*<sup>44</sup>, *Tg(oxt:Gal4)* and oxytocin mutants<sup>6</sup> were  
528 previously published.

529

### 530 MAP-mapping

531 7-8 dpf larvae, that had been continuously fed with an excess of paramecia since 5 dpf, were  
532 either isolated or split into small groups, using 35 mm dishes filled with 3 ml embryo water. For  
533 groups of 10, a larger (10 cm) dish was used to prevent overcrowding. Paramecia was present  
534 within each dish to ensure that the fish were well-fed and had ample stimulation. After 2 hrs,  
535 larvae were quickly funneled through a sieve, which was then quickly dropped into 4%  
536 paraformaldehyde, immunostained, imaged and analyzed as described in Randlett et al.  
537 (2015)<sup>11</sup>.

### 538 Exposure to sensory cues for high-resolution pERK experiments

539 For generation of conspecific-conditioned water, sibling or non-sibling larvae that had been  
540 continuously fed with an excess of paramecia from 5 dpf were transferred into a new 10 cm petri  
541 dish that did not contain any paramecia, at a concentration of 2 fish per ml. After a 2 hr  
542 incubation, a syringe with an attached 0.45 µm filter was used to very gently suck out the  
543 conditioned water, with great care taken not to disturb or stress the fish in the process.

544

545 7-8 dpf larvae, that had been continuously fed with an excess of paramecia since 5 dpf, were  
546 either isolated or split into small groups, using 35 mm dishes filled with 3 ml embryo water.

547 Paramecia was present within each dish to ensure that the fish were well-fed and had ample  
548 stimulation. 700  $\mu$ l of the filtered conspecific-conditioned water was added to each 35 mm dish  
549 (~1:5 dilution), 30 min before fixation, and embryo water was correspondingly added to controls.  
550 For providing visual access to conspecifics, the 35 mm dishes containing single larvae were  
551 inserted into larger (55mm) dishes containing ~5 larvae that thus be surrounding but unable to  
552 interact with the single larva. After 2 hrs, larvae were quickly funneled through a sieve, which  
553 was then quickly dropped into 4% paraformaldehyde, dissected in PBS and immunostained as  
554 described in Wee et al, 2019<sup>6</sup>.

555

#### 556 *High resolution pERK analysis*

557 For quantification of pERK/tERK ratios over individual OXT neurons, pERK experiments were  
558 performed on dissected *Tg(oxt:GFP)* brains. Cellular-resolution imaging of dissected brains was  
559 obtained using the Zeiss (LSM 700 and LSM 880) or Olympus (FVB1000MPE) confocal  
560 microscopes. pERK/tERK intensities of individual GFP-positive neurons were measured using  
561 ImageJ and quantified using MATLAB as reported in Wee et al, 2019<sup>6</sup>. Analysis code is also  
562 available on [www.github.com/carolinewee](http://www.github.com/carolinewee)

#### 563 *Social feeding experiments*

564 For experiments in which feeding was assessed, larvae that had been continuously fed with an  
565 excess of paramecia from 5 dpf were either isolated or placed in groups of 3, in 35 mm dishes  
566 (3 ml embryo water), in the *absence of food*. After 2 hours, fluorescent-labeled paramecia was  
567 added followed by a quick fixation after 30 min (full protocol is described in Wee et al, *eLife*,  
568 2019<sup>25</sup>). Sensory cues were generated and presented as described above for pERK  
569 experiments. Fixed larvae were subsequently distributed into 96-well flat-bottom dishes and  
570 imaged using the AxioZoom V16 (Zeiss) and analyzed using Fiji software (3D Objects Counter,  
571 custom software also available on [www.github.com/carolinewee](http://www.github.com/carolinewee))

572

#### 573 *Calcium imaging and olfactory stimulation*

574 8-11 dpf larval *Tg(oxt:Gal4;UAS:GCaMP6s)* fish in the nacre background were used for calcium  
575 imaging experiments. They were embedded in the center of a 55 cm dish in 1.5% agarose with  
576 their tails and noses freed.

577

578 Kin or non-kin conditioned water (at a concentration of 1 fish/ml) were generated as described  
579 above. In these calcium imaging experiments, we used WIK fish as non-kin fish, since the  
580 *Tg(oxt:Gal4;UAS:GCaMP6s)* fish we imaged were of the AB genetic background. For adult  
581 water, 5 adult kin (from parent tank of larvae) were used to condition 500 ml of water (1 adult  
582 fish/100 ml) for 2 hrs, and also subsequently filtered. Kin and non-kin fish used to condition  
583 water were raised apart from experimental fish from 3 dpf, to dissociate genetic from familiarity  
584 effects.

585

586 Alternating olfactory stimuli were delivered using a custom-built syringe pump system controlled  
587 by custom Labview software. At specified time intervals, 300  $\mu$ l of each cue (~30  $\mu$ l/second) was  
588 delivered using a zero-dead-volume multi-channel perfusion pencil (AutoMate Scientific).

589 Embryo water was also constantly circulated through the dish using a peristaltic pump (Harvard

590 Apparatus). The interstimulus interval (ISI) was 2 minutes for olfactory bulb imaging and 5  
591 minutes for OXT neuron imaging. The longer ISI for OXT neuron imaging was implemented to  
592 reduce desensitization and ensure that activity truly returned to baseline before presenting the  
593 subsequent stimulus. In order to reduce experiment time and avert the possibility of OXT  
594 neuron desensitization, we also never compared responses to more than 2 cues (e.g. either kin  
595 vs non-kin, or kin vs adult, but not all 3 stimuli).

596  
597 Calcium imaging and behavioral monitoring with TRPA1 stimulation was performed as  
598 previously reported<sup>6</sup> on 8-10 dpf larvae, with a number of core differences: 1) 15  $\mu$ M instead of  
599 25  $\mu$ M Optovin (Tocris Biosciences) was used, to reduce background signals (see below) 2)  
600 nostrils are exposed to allow for olfactory stimulation 3) the same UV stimulus intensity used  
601 throughout the experiment, and only 4 stimulations were presented (alternating kin and water).  
602 Since, in addition to the tail, the nose was exposed in this current paradigm, Optovin, a colored  
603 solution, was rapidly absorbed into the fish's brain and caused a linear increase in background  
604 signal (i.e. even in non-GCaMP-labeled tissue) over time. Post-hoc subtraction of this  
605 background signal from OXT GCaMP signals restored a flat baseline, allowing us to extract  
606 meaningful calcium signals.

#### 607 608 *Data analysis*

609 All calcium imaging data was analyzed using custom ImageJ and MATLAB software. The  
610 general protocol for analysis was: 1) Image registration to correct for motion artifacts using the  
611 TurboReg<sup>45</sup> plugin in ImageJ; 2) Extraction of fluorescence signals from both channels using  
612 manually-segmented ROIs in MATLAB or on a voxel-by-voxel basis 3) Calculation of  $\Delta f/f$  signals  
613 from raw traces and alignment to tail traces, as needed, in MATLAB.

614  
615 For fish expressing *Tg(UAS:GCaMP6s)* exclusively in oxt-expressing neurons, ROIs were  
616 drawn over all visible cells in a maximum projection image for each plane and raw fluorescence  
617 traces were extracted as the mean pixel value within the ROI. Other analysis was done on a  
618 voxel-by-voxel basis, rather than using cell segmentation, which would exclude responses from  
619 neuropil that are abundant in the OB and forebrain.  $\Delta f/f$  values were calculated from raw traces  
620 using the average fluorescence over the time period before the first stimulus as the baseline to  
621 which all traces were normalized.

622  
623 Behavior, stimulation and calcium imaging timestamps were aligned and used to extract  
624 stimulus-triggered averages as well as to generate motor and stimulus regressors to correlate  
625 with calcium activity. The regressors were convolved with a GCaMP6s kernel based on its  
626 measured response delay (0.48 s) and decay time (3s, based on Chen et al. (2013) and cross-  
627 correlated with calcium traces that had been smoothed with a 3-frame zero phase filter. In order  
628 to determine if an OXT neuron was activated or suppressed, we averaged the calcium signal  
629 over a 60s interval post-stimulus for each stimulus type. If the difference between the two  
630 integrated calcium signal during olfactory and water stimulation was more than 0.05, we  
631 classified the neurons as being either activated or suppressed by the cue depending on the  
632 sign. Although the threshold of 0.05 is arbitrary, we show that across a range of thresholds, the  
633 relationship between the proportions of suppressed and enhanced neurons remains consistent

634 for each type of stimulus. In addition, the first stimulus was always dropped from analysis, in  
635 order to account for possible effects of initial startle.

636  
637 Since there was no difference in kin water responses between younger (8 dpf (n=7 fish): 35%  
638 suppressed, 10% enhanced) and old (11 dpf (n = 7 fish): 37% suppressed, 10% enhanced) fish,  
639 we pooled data across all the ages. Fish were isolated for between 30 min to 4 hrs before  
640 imaging, though the bulk of experiments were performed with 1.5-2.5 hr isolation (note that time  
641 of isolation = time of embedding). We did not observe any consistent changes in kin water  
642 suppression with isolation times, thus any differences observed are likely due to random  
643 variation (1 hr or less isolation (n=5): 50% suppressed, 13% enhanced; 1.5 - 2.5 hrs isolation  
644 (n=19): 33% suppressed, 13% enhanced, 3-4hrs isolation (n=7): 40% suppressed, 5%  
645 enhanced).

#### 647 Free-swimming TRPA1 stimulation

648 Fish were singly placed into a 20.6 mm cut-out agarose circular mold illuminated by three quad  
649 blue LEDs (Luxeon Star, 470 nm). To probe the effect of conspecific cues, DMSO or Optovin  
650 solutions were generated either in embryo water or kin-conditioned water. Following 5 min of  
651 habituation in DMSO (effectively also the isolation period), fish were stimulated once every 30 s  
652 with a 100 ms pulse of blue light. The DMSO solution was then exchanged with Optovin, and  
653 the same protocol repeated. Behavior was recorded at 200 fps (Pike F-032, Allied Vision) and  
654 analyzed using custom Python software.

#### 656 Statistics

657 All error bars show mean  $\pm$  SEM over fish. Significance was reported as follows: \* $p < 0.05$ ,  
658 \*\* $p < 0.01$ , \*\*\* $p < 0.001$ . Significance was determined using the Wilcoxon signed-rank test for  
659 paired data and the Wilcoxon rank-sum test for independent samples. One-sided tests were  
660 used in cases where there was a clear hypothesis for the direction of effect. One-way ANOVA  
661 with Bonferroni Correction was used in cases where there were multiple comparisons. Wilcoxon  
662 signed rank test was used in Fig. 1a for comparing the distribution of normalized OXT ROI  
663 signals across different behavioral stimuli to the null hypothesis of median 1.

#### 665 **DATA AVAILABILITY**

666 All data, code (hardware control and analysis) and resources (transgenic lines/mutants  
667 generated) will be made available by the corresponding author upon request.

#### 669 **CODE AVAILABILITY**

670 Live versions of the analysis code are maintained at [www.github.com/carolinewee](http://www.github.com/carolinewee).

#### 672 **ACKNOWLEDGEMENTS**

673 We are grateful to Adam Douglass (Univ. of Utah) for continued support, advice, and comments.  
674 We thank the CBS imaging facility, Harvard Center for Biological Imaging, and the NorthWest  
675 Undergraduate Teaching Laboratories at Harvard for the successful completion of many  
676 experiments. J. Miller, K. Hurley and B. Hughes provided invaluable fish care. This work was  
677 supported by U01-NS090449 (FE), R24-NS086601 (FE), U19-NS104653 (FE and SK) and

678 Simons Foundation grant SCGB 325207 (FE). CLW was supported by the National Science  
679 Scholarship from the Agency for Science, Technology and Research (A\*STAR), Singapore.

680

#### 681 **AUTHOR CONTRIBUTIONS**

682 C.L.W., E.S., and S.K. originally conceived of the project, which was then developed into its final  
683 form with M.N and F.E.

684 S.K. & F.E. supervised the project. C.L.W., E.S., and M.N. designed and performed most of the  
685 experiments, and analyzed most of the data. M.N. also developed hardware and software for  
686 calcium imaging and behavioral experiments, and analyzed the free-swimming behavioral data.

687 S.W. performed feeding experiments and analyzed data. C.L.W., S.K., and F.E. wrote the  
688 manuscript with contribution from all other authors.

689

#### 690 **COMPETING INTERESTS**

691 The authors declare no competing interests.

692

#### 693 **REFERENCES:**

694 1. Rash, J. A., Aguirre-Camacho, A. & Campbell, T. S. Oxytocin and pain: a systematic review  
695 and synthesis of findings. *Clin. J. Pain* **30**, 453–462 (2014).

696 2. Lieberwirth, C. & Wang, Z. Social bonding: regulation by neuropeptides. *Front. Neurosci.* **8**,  
697 171 (2014).

698 3. Jezova, D., Skultetyova, I., Tokarev, D. I., Bakos, P. & Vigas, M. Vasopressin and Oxytocin  
699 in Stress. *Ann. N. Y. Acad. Sci.* **771**, 192–203 (1995).

700 4. Leng, G., Onaka, T., Caquineau, C., Sabatier, N., Tobin, V. A. & Takayanagi, Y. Oxytocin  
701 and appetite. *Prog. Brain Res.* **170**, 137–151 (2008).

702 5. Sabatier, N., Leng, G. & Menzies, J. Oxytocin, feeding, and satiety. *Front. Endocrinol.* **4**,  
703 35 (2013).

704 6. Wee, C. L., Nikitchenko, M., Wang, W.-C., Luks-Morgan, S. J., Song, E., Gagnon, J. A.,  
705 Randlett, O., Bianco, I. H., Lacoste, A. M. B., Glushenkova, E., Barrios, J. P., Schier, A. F.,  
706 Kunes, S., Engert, F. & Douglass, A. D. Zebrafish oxytocin neurons drive nocifensive  
707 behavior via brainstem premotor targets. *Nat. Neurosci.* **22**, 1477–1492 (2019).

708 7. Lovett-Barron, M., Chen, R., Bradbury, S., Andalman, A. S., Wagle, M., Guo, S. &  
709 Deisseroth, K. Multiple overlapping hypothalamus-brainstem circuits drive rapid threat

- 710 avoidance. *bioRxiv* 745075 (2019). doi:10.1101/745075
- 711 8. Herget, U., Gutierrez-Triana, J. A., Salazar Thula, O., Knerr, B. & Ryu, S. Single-Cell  
712 Reconstruction of Oxytocinergic Neurons Reveals Separate Hypophysiotropic and  
713 Enkephalotropic Subtypes in Larval Zebrafish. *eneuro* **4**, ENEURO.0278–16.2016 (2017).
- 714 9. Stoop, R. Neuromodulation by oxytocin and vasopressin. *Neuron* **76**, 142–159 (2012).
- 715 10. Knobloch, H. S. & Grinevich, V. Evolution of oxytocin pathways in the brain of vertebrates.  
716 *Front. Behav. Neurosci.* **8**, 31 (2014).
- 717 11. Randlett, O., Wee, C. L., Naumann, E. A., Nnaemeka, O., Schoppik, D., Fitzgerald, J. E.,  
718 Portugues, R., Lacoste, A. M. B., Riegler, C., Engert, F. & Schier, A. F. Whole-brain activity  
719 mapping onto a zebrafish brain atlas. *Nat. Methods* **12**, 1039–1046 (2015).
- 720 12. Wircer, E., Blechman, J., Borodovsky, N., Tsoory, M., Nunes, A. R., Oliveira, R. F. &  
721 Levkowitz, G. Homeodomain protein Otp affects developmental neuropeptide switching in  
722 oxytocin neurons associated with a long-term effect on social behavior. *Elife* **6**, (2017).
- 723 13. Herget, U., Wolf, A., Wullimann, M. F. & Ryu, S. Molecular neuroanatomy and  
724 chemoarchitecture of the neurosecretory preoptic-hypothalamic area in zebrafish larvae. *J.*  
725 *Comp. Neurol.* **522**, 1542–1564 (2014).
- 726 14. Gerlach, G., Hodgins-Davis, A., Avolio, C. & Schunter, C. Kin recognition in zebrafish: a 24-  
727 hour window for olfactory imprinting. *Proc. Biol. Sci.* **275**, 2165–2170 (2008).
- 728 15. Biechl, D., Tietje, K., Gerlach, G. & Wullimann, M. F. Crypt cells are involved in kin  
729 recognition in larval zebrafish. *Sci. Rep.* **6**, 24590 (2016).
- 730 16. Rauch, G.-J., Granato, M. & Haffter, P. A polymorphic zebrafish line for genetic mapping  
731 using SSLPs on high-percentage agarose gels. *Tech. Tips Online* **2**, 148–150 (1997).
- 732 17. Saito, D., Komatsuda, M. & Urano, A. Functional organization of preoptic vasotocin and  
733 isotocin neurons in the brain of rainbow trout: central and neurohypophysial projections of  
734 single neurons. *Neuroscience* **124**, 973–984 (2004).
- 735 18. Swanson, L. W. & Sawchenko, P. E. Paraventricular nucleus: a site for the integration of

- 736 neuroendocrine and autonomic mechanisms. *Neuroendocrinology* **31**, 410–417 (1980).
- 737 19. Sawchenko, P. E. & Swanson, L. W. Immunohistochemical identification of neurons in the  
738 paraventricular nucleus of the hypothalamus that project to the medulla or to the spinal cord  
739 in the rat. *J. Comp. Neurol.* **205**, 260–272 (1982).
- 740 20. Kikusui, T., Winslow, J. T. & Mori, Y. Social buffering: relief from stress and anxiety. *Philos.*  
741 *Trans. R. Soc. Lond. B Biol. Sci.* **361**, 2215–2228 (2006).
- 742 21. Kiyokawa, Y. Social Odors: Alarm Pheromones and Social Buffering. *Curr. Top. Behav.*  
743 *Neurosci.* (2015). doi:10.1007/7854\_2015\_406
- 744 22. Bazhan, N. & Zelena, D. Food-intake regulation during stress by the hypothalamo-pituitary-  
745 adrenal axis. *Brain Res. Bull.* **95**, 46–53 (2013).
- 746 23. Shimada, Y., Hirano, M., Nishimura, Y. & Tanaka, T. A high-throughput fluorescence-based  
747 assay system for appetite-regulating gene and drug screening. *PLoS One* **7**, e52549  
748 (2012).
- 749 24. Jordi, J., Guggiana-Nilo, D., Soucy, E., Song, E. Y., Wee, C. L. & Engert, F. A high-  
750 throughput assay for quantifying appetite and digestive dynamics. *Am. J. Physiol. Regul.*  
751 *Integr. Comp. Physiol.* ajpregu.00225.2015 (2015). doi:10.1152/ajpregu.00225.2015
- 752 25. Wee, C. L., Song, E. Y., Johnson, R. E., Ailani, D., Randlett, O., Kim, J.-Y., Nikitchenko, M.,  
753 Bahl, A., Yang, C.-T., Ahrens, M. B., Kawakami, K., Engert, F. & Kunes, S. A bidirectional  
754 network for appetite control in larval zebrafish. *Elife* **8**, (2019).
- 755 26. Dreosti, E., Lopes, G., Kampff, A. R. & Wilson, S. W. Development of social behavior in  
756 young zebrafish. *Front. Neural Circuits* **9**, 39 (2015).
- 757 27. Tunbak, H., Vazquez-Pradam, M., Ryan, T., Kampff, A. R. & Dreosti, E. The lonely fish is  
758 not a loner fish: whole-brain mapping reveals abnormal activity in socially isolated  
759 zebrafish. *bioRxiv* 2020.01.22.915520 (2020). doi:10.1101/2020.01.22.915520
- 760 28. Eisenberger, N. I., Lieberman, M. D. & Williams, K. D. Does Rejection Hurt? An fMRI Study  
761 of Social Exclusion. *Science* **302**, 290–292 (2003).

- 762 29. Higgs, S. & Thomas, J. Social influences on eating. *Current Opinion in Behavioral Sciences*  
763 **9**, 1–6 (2016).
- 764 30. White, L. J., Thomson, J. S., Pounder, K. C., Coleman, R. C. & Sneddon, L. U. The impact  
765 of social context on behaviour and the recovery from welfare challenges in zebrafish, *Danio*  
766 *rerio. Anim. Behav.* **132**, 189–199 (2017).
- 767 31. Smith, A. S. & Wang, Z. Hypothalamic oxytocin mediates social buffering of the stress  
768 response. *Biol. Psychiatry* **76**, 281–288 (2014).
- 769 32. Swaab, D. F. Neuropeptides in hypothalamic neuronal disorders. *Int. Rev. Cytol.* **240**, 305–  
770 375 (2004).
- 771 33. Francis, S. M., Sagar, A., Levin-Decanini, T., Liu, W., Carter, C. S. & Jacob, S. Oxytocin  
772 and vasopressin systems in genetic syndromes and neurodevelopmental disorders. *Brain*  
773 *Res.* **1580**, 199–218 (2014).
- 774 34. Atasoy, D., Betley, J. N., Su, H. H. & Sternson, S. M. Deconstruction of a neural circuit for  
775 hunger. *Nature* **488**, 172–177 (2012).
- 776 35. Xi, D., Gandhi, N., Lai, M. & Kublaoui, B. M. Ablation of Sim1 neurons causes obesity  
777 through hyperphagia and reduced energy expenditure. *PLoS One* **7**, e36453 (2012).
- 778 36. Tolson, K. P., Gemelli, T., Meyer, D., Yazdani, U., Kozlitina, J. & Zinn, A. R. Inducible  
779 neuronal inactivation of Sim1 in adult mice causes hyperphagic obesity. *Endocrinology* **155**,  
780 2436–2444 (2014).
- 781 37. Olszewski, P. K., Allen, K. & Levine, A. S. Effect of oxytocin receptor blockade on appetite  
782 for sugar is modified by social context. *Appetite* **86**, 81–87 (2015).
- 783 38. Fischer, E. K. & O’Connell, L. A. Modification of feeding circuits in the evolution of social  
784 behavior. *J. Exp. Biol.* **220**, 92–102 (2017).
- 785 39. Resendez, S. L., Namboodiri, V. M. K., Otis, J. M., Eckman, L. E. H., Rodriguez-  
786 Romaguera, J., Ung, R. L., Basiri, M. L., Kosyk, O., Rossi, M. A., Dichter, G. S. & Stuber,  
787 G. D. Social stimuli induce activation of oxytocin neurons within the paraventricular nucleus



- 788 of the hypothalamus to promote social behavior in male mice. *J. Neurosci.* (2020).  
789 doi:10.1523/JNEUROSCI.1515-18.2020
- 790 40. Grillon, C., Krimsky, M., Charney, D. R., Vytal, K., Ernst, M. & Cornwell, B. Oxytocin  
791 increases anxiety to unpredictable threat. *Mol. Psychiatry* **18**, 958–960 (2013).
- 792 41. Coffey, C. M., Solleveld, P. a., Fang, J., Roberts, A. K., Hong, S.-K., Dawid, I. B.,  
793 Laverriere, C. E. & Glasgow, E. Novel oxytocin gene expression in the hindbrain is induced  
794 by alcohol exposure: transgenic zebrafish enable visualization of sensitive neurons. *PLoS*  
795 *One* **8**, e53991 (2013).
- 796 42. Muto, A., Lal, P., Ailani, D., Abe, G., Itoh, M. & Kawakami, K. Activation of the hypothalamic  
797 feeding centre upon visual prey detection. *Nat. Commun.* **8**, 15029 (2017).
- 798 43. Davison, J. M., Akitake, C. M., Goll, M. G., Rhee, J. M., Gosse, N., Baier, H., Halpern, M.  
799 E., Leach, S. D. & Parsons, M. J. Transactivation from Gal4-VP16 transgenic insertions for  
800 tissue-specific cell labeling and ablation in zebrafish. *Dev. Biol.* **304**, 811–824 (2007).
- 801 44. Kim, D. H., Kim, J., Marques, J. C., Grama, A., Hildebrand, D. G. C., Gu, W., Li, J. M. &  
802 Robson, D. N. Pan-neuronal calcium imaging with cellular resolution in freely swimming  
803 zebrafish. *Nat. Methods* **14**, 1107–1114 (2017).
- 804 45. Thevenaz, P., Ruttimann, U. E. & Unser, M. A pyramid approach to subpixel registration  
805 based on intensity. *IEEE Trans. Image Process.* **7**, 27–41 (1998).

806
